# Supplementary material
Source: PubMed Central journal article supplement (PMC4642275)
Supplement: NIHMS735293-supplement-Supporting_Information.pdf [file NIHMS735293-supplement-Supporting_Information.pdf]

# Supporting Information

## **SPECTROSCOPIC AND COMPUTATIONAL INVESTIGATION OF THE H155A VARIANT OF CYSTEINE DIOXYGENASE: GEOMETRIC AND ELECTRONIC CONSEQUENCES OF A THIRD-SPHERE AMINO ACID SUBSTITUTION**

*Elizabeth J. Blaesl,<sup>1+</sup> Brian G. Fox,<sup>2</sup> Thomas C. Brunold<sup>1\*</sup>*

1. Department of Chemistry, University of Wisconsin-Madison, Madison, WI 53706

2. Department of Biochemistry, University of Wisconsin-Madison, Madison, WI 53706

<sup>+</sup> Present address: 317 Chemistry Building, Pennsylvania State University, University Park, PA 16802

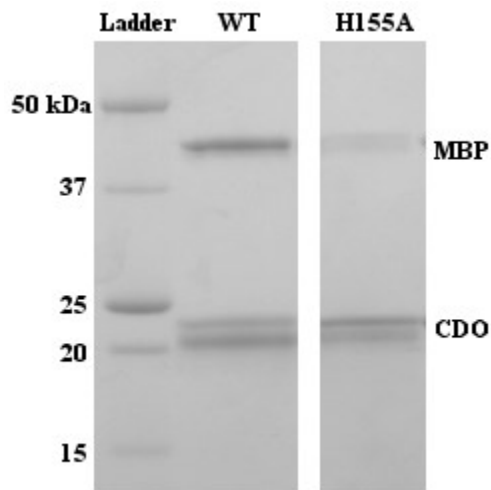

**Figure S1:** Fragment of an SDS-PAGE gel illustrating protein purity and degree of crosslink formation for typical isolations of WT and H155A CDO. Note that residual maltose binding protein (MBP) present does not interfere with our spectroscopic methods.

**Table S1:** Experimentally derived and computationally predicted EPR parameters for the (OH<sup>-</sup>/Cys) adducts of H155A and WT Fe(III)CDO. Values for WT CDO are reproduced from Ref. 17.

|                     | $g_1$ | $g_2$ | $g_3$ | $D$ (cm <sup>-1</sup> ) | E/D   |
|---------------------|-------|-------|-------|-------------------------|-------|
| <b>WT, exp.</b>     | 2.030 | 2.030 | 2.030 | 0.726                   | 0.317 |
| <b>WT, comp.</b>    | 2.011 | 2.016 | 2.028 | 0.868                   | 0.207 |
| <b>H155A, exp.</b>  | 2.030 | 2.030 | 2.030 | 0.726                   | 0.317 |
| <b>H155A, comp.</b> | 2.010 | 2.015 | 2.027 | 0.954                   | 0.272 |

**Table S2:** Experimentally derived and computationally predicted EPR parameters for the (NO/Cys) adducts of H155A and WT Fe(II)CDO. Hyperfine coupling constants for the <sup>14</sup>N nucleus of the NO ligand are given in MHz. All values for WT CDO are reproduced from Ref. 20.

| Species             | $g_1$ | $g_2$ | $g_3$ | $A_1$ | $A_2$ | $A_3$ |
|---------------------|-------|-------|-------|-------|-------|-------|
| <b>WT, exp.</b>     | 1.979 | 2.028 | 2.071 | <30   | 100   | <30   |
| <b>WT, comp.</b>    | 1.962 | 1.990 | 2.016 | 15    | 90    | 11    |
| <b>H155A, exp.</b>  | 1.974 | 2.015 | 2.075 | <30   | 57    | <30   |
| <b>H155A, comp.</b> | 1.952 | 1.997 | 2.036 | 12    | 81    | 10    |

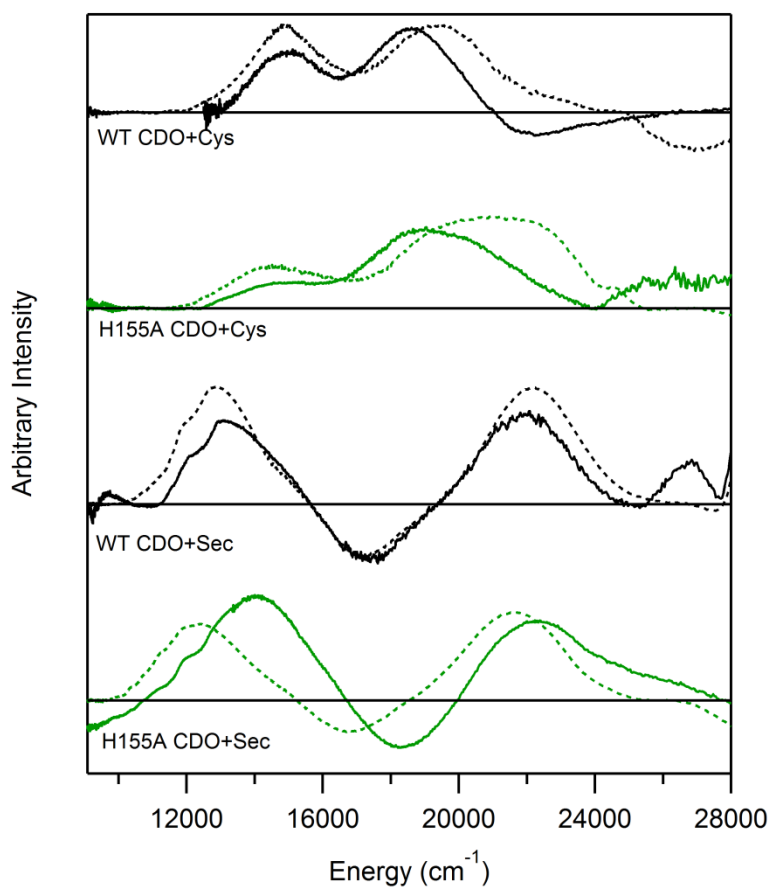

**Figure S2:** MCD spectra (4.5 K, 7 T) of as-isolated Cys- or Sec-bound WT and H155A CDO in the presence (dotted lines) and absence (solid lines) of sodium azide.

**Table S3.** Bond distances (in Angstroms) for various Sec-bound CDO species as obtained by whole-protein QM/MM optimizations, as well as for the crystallographically characterized Cys-adduct of WT Fe(II)CDO, where X refers to the ligating atom of the sixth ligand present at the Fe center (where applicable).

| Species                                     | Fe-N <sub>H86</sub> | Fe-N <sub>H88</sub> | Fe-N <sub>H140</sub> | Fe-Se <sub>Sec</sub> | Fe-N <sub>Sec</sub> | Fe-X  | Sec-R60,<br>1 | Sec-R60,<br>2 | Sec-Y157 |
|---------------------------------------------|---------------------|---------------------|----------------------|----------------------|---------------------|-------|---------------|---------------|----------|
| 4JTO, WT (Cys)-<br>Fe(II)CDO <sup>a</sup>   | 1.893               | 2.199               | 2.110                | 2.291                | 2.262               | N/A   | N/A           | N/A           | N/A      |
| WT (Sec)-Fe(II)CDO                          | 2.166               | 2.171               | 2.149                | 2.529                | 2.250               | N/A   | 1.769         | 1.940         | 1.525    |
| H155A (Sec)-Fe(II)CDO                       | 2.158               | 2.203               | 2.174                | 2.503                | 2.256               | N/A   | 1.712         | 2.101         | 1.552    |
| H155A (H <sub>2</sub> O/Sec)-<br>Fe(II)CDO  | 2.191               | 2.294               | 2.166                | 2.654                | 2.24                | 2.283 | 1.805         | 1.680         | 1.509    |
| WT (OH <sup>-</sup> /Sec)-Fe(III)CDO        | 2.330               | 2.295               | 2.108                | 2.599                | 2.226               | 1.877 | 1.981         | 1.785         | 1.535    |
| H155A (OH <sup>-</sup> /Sec)-<br>Fe(III)CDO | 2.334               | 2.259               | 2.116                | 2.601                | 2.232               | 1.86  | 1.91          | 1.824         | 1.571    |
| WT (NO/Sec)-Fe(II)CDO                       | 2.116               | 2.102               | 2.015                | 2.506                | 2.131               | 1.775 | 1.768         | 1.996         | 1.529    |
| H155A (NO/Sec)-<br>Fe(II)CDO                | 2.141               | 2.159               | 2.032                | 2.490                | 2.073               | 1.778 | 1.658         | 1.918         | 1.545    |

<sup>a</sup> Crystal structure at 2.00 Å resolution, from Ref. 14.

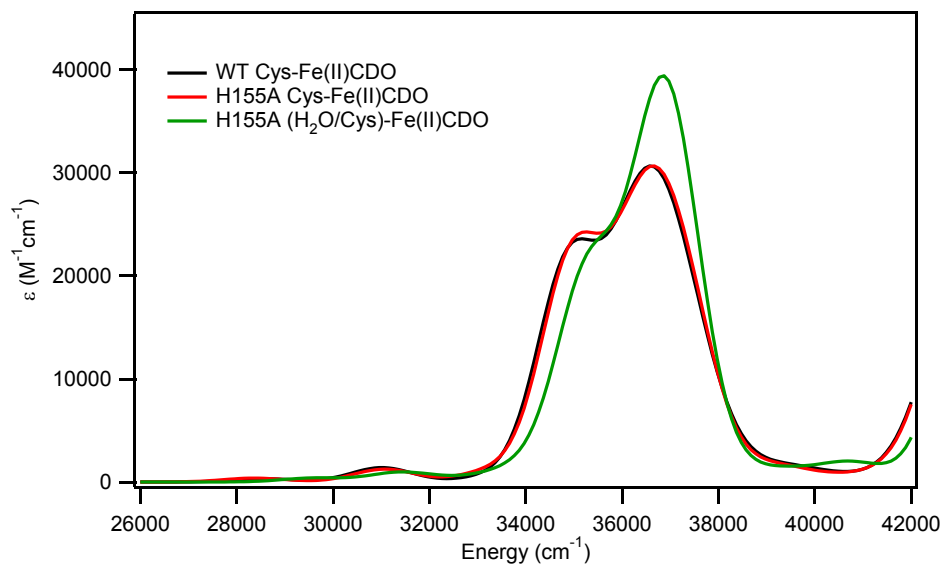

**Figure S3:** INDO/S-CI predicted Abs spectra for the Cys adducts of WT and H155A Fe(II)CDO.

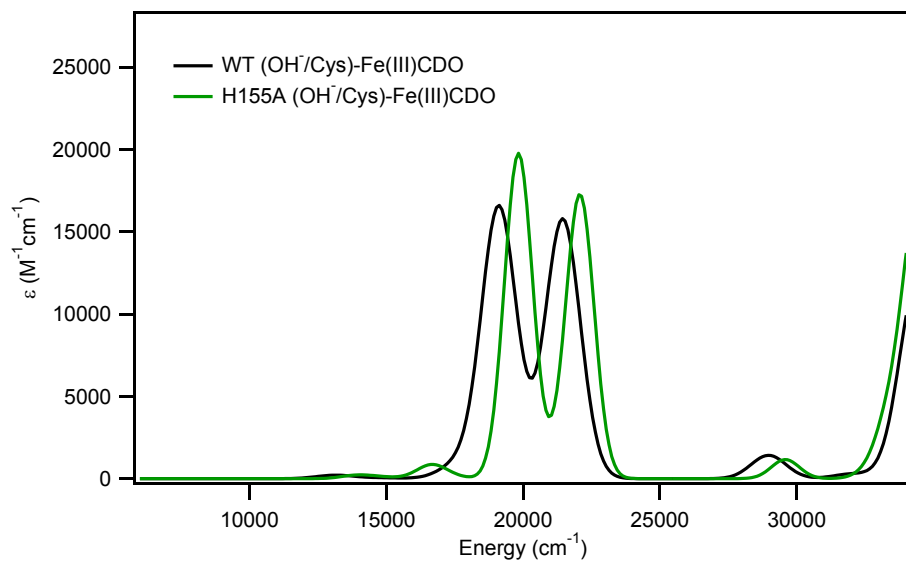

**Figure S4:** INDO/S-CI predicted Abs spectra for the (OH<sup>-</sup>/Cys) adducts of WT and H155A Fe(III)CDO.

**Table S4:** Cartesian coordinates (in Å) for the QM/MM-optimized active site of WT Cys-Fe(II)CDO (SCF Energy = -4612.77465483 Eh)

| Atom | x         | y         | z         | Atom | x         | y         | z         |
|------|-----------|-----------|-----------|------|-----------|-----------|-----------|
| C    | -2.594452 | -0.263107 | 4.972992  | C    | 0.394608  | -4.355850 | 0.557083  |
| C    | -1.462051 | -0.158005 | 4.015366  | C    | -0.170700 | -3.139679 | 0.870178  |
| C    | -1.445435 | 0.325180  | 2.731537  | N    | 1.208755  | -4.083466 | -0.542450 |
| N    | -0.189835 | -0.700027 | 4.204865  | C    | 1.116089  | -2.758606 | -0.845444 |
| C    | 0.522522  | -0.550064 | 3.045532  | N    | 0.294693  | -2.156937 | 0.001389  |
| N    | -0.217407 | 0.073624  | 2.140366  | H    | -0.221725 | -5.830261 | 2.153702  |
| H    | -3.079620 | -1.312134 | 5.005951  | H    | 1.281403  | -6.176620 | 1.194229  |
| H    | -3.370377 | 0.449097  | 4.673660  | H    | -0.271378 | -6.376450 | 0.416672  |
| H    | -2.301346 | 0.010376  | 5.992416  | H    | -0.865829 | -2.898819 | 1.658356  |
| H    | -2.204559 | 0.876160  | 2.208725  | H    | 1.732407  | -4.753082 | -1.106659 |
| H    | 0.135086  | -1.185974 | 5.030960  | H    | 1.665146  | -2.284042 | -1.641342 |
| H    | 1.533478  | -0.889526 | 2.894700  | Fe   | 0.000000  | 0.000000  | 0.000000  |
| C    | -5.334076 | 0.429443  | -2.196075 | N    | 0.000015  | 2.249649  | -0.000015 |
| C    | -3.923981 | -0.048172 | -1.986786 | C    | 1.245178  | 2.742264  | 0.671204  |
| C    | -2.746262 | 0.625763  | -1.707870 | C    | 1.394104  | 4.267990  | 0.561356  |
| N    | -3.632095 | -1.376373 | -1.721024 | O    | 1.205185  | 4.793274  | -0.624588 |
| C    | -2.358017 | -1.463058 | -1.266937 | C    | 2.494705  | 2.074524  | 0.054779  |
| N    | -1.776489 | -0.264557 | -1.242218 | S    | 2.354416  | 0.238129  | -0.072891 |
| H    | -5.801163 | 0.738892  | -1.185104 | O    | 1.752502  | 4.949829  | 1.574234  |
| H    | -5.959793 | -0.347687 | -2.647354 | H    | -0.808365 | 2.699921  | 0.433075  |
| H    | -5.360291 | 1.297546  | -2.861053 | H    | 0.027527  | 2.529068  | -0.982956 |
| H    | -2.501633 | 1.653931  | -1.916351 | H    | 1.163651  | 2.476288  | 1.727081  |
| H    | -4.212112 | -2.215469 | -1.827881 | H    | 3.363251  | 2.326767  | 0.666214  |
| H    | -1.912216 | -2.393066 | -0.968338 | H    | 2.665665  | 2.461792  | -0.950455 |
| C    | 0.280731  | -5.735596 | 1.114685  |      |           |           |           |

**Table S5:** Cartesian coordinates (in Å) for the QM/MM-optimized active site of H155A Cys-Fe(II)CDO (SCF Energy = -4387.83931423 Eh)

| Atom | x         | y         | z         | Atom | x         | y         | z         |
|------|-----------|-----------|-----------|------|-----------|-----------|-----------|
| C    | -2.816757 | -0.244461 | 4.883118  | C    | 0.479538  | -4.321960 | 0.655396  |
| C    | -1.654755 | -0.137177 | 3.958527  | C    | -0.102341 | -3.107208 | 0.939056  |
| C    | -1.604584 | 0.302582  | 2.659363  | N    | 1.269241  | -4.072556 | -0.466782 |
| N    | -0.366150 | -0.605057 | 4.219696  | C    | 1.150482  | -2.759155 | -0.808563 |
| C    | 0.389420  | -0.455124 | 3.087952  | N    | 0.331528  | -2.146057 | 0.032349  |
| N    | -0.339783 | 0.096863  | 2.128891  | H    | -0.138092 | -5.748093 | 2.286102  |
| H    | -3.279541 | -1.303253 | 4.945068  | H    | 1.425705  | -6.061554 | 1.422700  |
| H    | -3.601196 | 0.436371  | 4.536392  | H    | -0.074661 | -6.379196 | 0.582184  |
| H    | -2.561142 | 0.074173  | 5.899643  | H    | -0.791550 | -2.853012 | 1.728180  |
| H    | -2.363480 | 0.803619  | 2.089066  | H    | 1.798600  | -4.752655 | -1.012939 |
| H    | -0.046478 | -1.039886 | 5.075684  | H    | 1.681213  | -2.299667 | -1.625137 |
| H    | 1.422531  | -0.745789 | 2.995834  | Fe   | 0.000000  | 0.000000  | 0.000000  |
| C    | -5.334747 | 0.191833  | -2.328705 | N    | 0.000015  | 2.255692  | 0.000015  |
| C    | -3.915207 | -0.219574 | -2.040741 | C    | 1.273865  | 2.721390  | 0.640839  |
| C    | -2.754227 | 0.495789  | -1.787079 | C    | 1.414780  | 4.251816  | 0.614532  |
| N    | -3.599838 | -1.522217 | -1.686005 | O    | 1.161133  | 4.841888  | -0.529984 |
| C    | -2.331665 | -1.553421 | -1.211441 | C    | 2.473663  | 2.068176  | -0.077179 |
| N    | -1.772690 | -0.343567 | -1.253723 | S    | 2.359924  | 0.226013  | -0.059250 |
| H    | -5.870804 | 0.518967  | -1.356369 | O    | 1.790573  | 4.874710  | 1.657883  |
| H    | -5.901382 | -0.632095 | -2.775803 | H    | -0.794540 | 2.697098  | 0.466141  |
| H    | -5.368744 | 1.026062  | -3.033844 | H    | 0.002609  | 2.558075  | -0.977249 |
| H    | -2.520554 | 1.514786  | -2.046326 | H    | 1.246979  | 2.396011  | 1.682693  |
| H    | -4.167267 | -2.377853 | -1.765594 | H    | 3.396713  | 2.381241  | 0.414444  |
| H    | -1.869644 | -2.453705 | -0.852585 | H    | 2.504562  | 2.392731  | -1.119385 |
| C    | 0.410141  | -5.677170 | 1.270996  |      |           |           |           |

**Table S6:** Cartesian coordinates (in Å) for the QM/MM-optimized active site of H155A (H<sub>2</sub>O/Cys)-Fe(II)CDO (SCF Energy = -4387.90216576 Eh)

| Atom | x         | y         | z         | Atom | x         | y         | z         |
|------|-----------|-----------|-----------|------|-----------|-----------|-----------|
| C    | -2.201553 | -5.305695 | 0.231491  | C    | -0.148453 | -1.150482 | -2.990600 |
| C    | -1.196060 | -4.204956 | 0.195007  | N    | 1.000488  | 0.317841  | -4.137604 |
| C    | -1.324783 | -2.871140 | 0.495453  | C    | 0.920441  | 0.742172  | -2.846313 |
| N    | 0.109253  | -4.326248 | -0.284744 | N    | 0.244003  | -0.138306 | -2.123642 |
| C    | 0.696838  | -3.090469 | -0.271255 | H    | -0.181381 | -2.619461 | -5.514709 |
| N    | -0.153610 | -2.190796 | 0.202484  | H    | 1.127533  | -1.578644 | -6.094849 |
| H    | -2.666900 | -5.524506 | -0.740952 | H    | -0.532333 | -1.028229 | -6.207794 |
| H    | -3.001266 | -5.027756 | 0.926331  | H    | -0.746384 | -1.980087 | -2.650497 |
| H    | -1.765915 | -6.234604 | 0.617233  | H    | 1.403198  | 0.877900  | -4.888245 |
| H    | -2.143341 | -2.361847 | 0.963028  | H    | 1.341125  | 1.664017  | -2.487961 |
| H    | 0.540359  | -5.166962 | -0.648819 | O    | 0.699905  | 2.178146  | -0.326355 |
| H    | 1.707169  | -2.884293 | -0.582077 | H    | 1.585571  | 1.861923  | -0.041641 |
| C    | -5.716782 | 1.391861  | 0.509674  | H    | 0.338898  | 2.817810  | 0.314713  |
| C    | -4.313385 | 1.286209  | -0.009918 | Fe   | 0.000000  | 0.000000  | 0.000000  |
| C    | -3.063721 | 1.337845  | 0.579514  | N    | -0.000015 | -0.000015 | 2.278076  |
| N    | -4.060150 | 0.800491  | -1.288284 | C    | 1.267044  | -0.593796 | 2.809723  |
| C    | -2.725525 | 0.540939  | -1.417450 | C    | 1.416672  | -0.471298 | 4.333679  |
| N    | -2.085587 | 0.854813  | -0.295700 | O    | 1.040741  | 0.659515  | 4.885696  |
| H    | -6.076157 | 0.427292  | 0.897537  | C    | 2.480667  | 0.091568  | 2.146683  |
| H    | -6.400772 | 1.727127  | -0.278915 | S    | 2.497803  | -0.128296 | 0.313583  |
| H    | -5.784515 | 2.128204  | 1.312332  | O    | 1.959549  | -1.417709 | 4.985779  |
| H    | -2.789047 | 1.759735  | 1.532761  | H    | -0.798523 | -0.494888 | 2.680817  |
| H    | -4.772110 | 0.578644  | -1.985336 | H    | -0.060272 | 0.973740  | 2.585938  |
| H    | -2.321396 | 0.124405  | -2.322037 | H    | 1.260803  | -1.653992 | 2.550369  |
| C    | 0.167145  | -1.577347 | -5.564789 | H    | 3.395111  | -0.324738 | 2.570953  |
| C    | 0.315796  | -0.889526 | -4.257600 | H    | 2.453339  | 1.161377  | 2.380081  |



**Table S7:** Cartesian coordinates (in Å) for the QM/MM-optimized active site of WT (OH<sup>-</sup>/Cys)-Fe(III)CDO (SCF Energy = -4688.60450292 Eh)

| Atom | x         | y         | z         | Atom | x         | y         | z         |
|------|-----------|-----------|-----------|------|-----------|-----------|-----------|
| C    | -0.980774 | 0.472046  | 5.835953  | C    | -0.143906 | -2.892456 | 1.454819  |
| C    | -0.308365 | 0.322632  | 4.511322  | N    | 0.427994  | -4.162094 | -0.232864 |
| C    | -0.737732 | 0.620193  | 3.237900  | C    | 0.447083  | -2.871475 | -0.646957 |
| N    | 0.952087  | -0.250702 | 4.328491  | N    | 0.123871  | -2.075806 | 0.365463  |
| C    | 1.22435   | -0.281158 | 2.988846  | H    | -0.089081 | -5.389771 | 2.991745  |
| N    | 0.222046  | 0.251053  | 2.302200  | H    | 0.734879  | -6.152161 | 1.569138  |
| H    | -1.485229 | -0.489059 | 6.236908  | H    | -1.015900 | -6.019043 | 1.558960  |
| H    | -1.760239 | 1.235992  | 5.751831  | H    | -0.482758 | -2.485611 | 2.392395  |
| H    | -0.281342 | 0.835068  | 6.596207  | H    | 0.605743  | -4.931168 | -0.875977 |
| H    | -1.634415 | 1.128311  | 2.934296  | H    | 0.669266  | -2.554504 | -1.649292 |
| H    | 1.515427  | -0.696060 | 5.041122  | O    | -0.167694 | -0.365800 | -1.836044 |
| H    | 2.133759  | -0.667221 | 2.561707  | Fe   | 0.000000  | 0.000000  | 0.000000  |
| C    | -5.914215 | 0.933900  | 0.250595  | H    | 0.598404  | -0.095795 | -2.352814 |
| C    | -4.543442 | 0.340485  | 0.128326  | N    | -0.000015 | 2.222534  | 0.000000  |
| C    | -3.301758 | 0.862213  | -0.178391 | C    | 1.332733  | 2.821548  | 0.322617  |
| N    | -4.264694 | -0.944138 | 0.587387  | C    | 1.423538  | 4.328537  | 0.039000  |
| C    | -2.913040 | -1.137482 | 0.587479  | O    | 0.779968  | 4.793839  | -1.000900 |
| N    | -2.294861 | -0.054993 | 0.130676  | C    | 2.419693  | 2.096710  | -0.488312 |
| H    | -6.120178 | 1.357803  | 1.312042  | S    | 2.423676  | 0.288666  | -0.140335 |
| H    | -6.682205 | 0.185028  | 0.030014  | O    | 2.190704  | 5.040039  | 0.764206  |
| H    | -6.048874 | 1.740753  | -0.473770 | H    | -0.706345 | 2.622391  | 0.621643  |
| H    | -3.076920 | 1.787476  | -0.683182 | H    | -0.267731 | 2.458145  | -0.961441 |
| H    | -4.947250 | -1.600067 | 0.973862  | H    | 1.506638  | 2.659042  | 1.387283  |
| H    | -2.478683 | -2.063004 | 0.925613  | H    | 3.397705  | 2.509689  | -0.235641 |
| C    | -0.095398 | -5.490402 | 1.844604  | H    | 2.248383  | 2.251556  | -1.558273 |
| C    | 0.040543  | -4.208664 | 1.104935  |      |           |           |           |

**Table S8:** Cartesian coordinates (in Å) for the QM/MM-optimized active site of H155A (OH/Cys)-Fe(III)CDO (SCF Energy = -4463.69981138 Eh)

| Atom | x         | y         | z         | Atom | x         | y         | z         |
|------|-----------|-----------|-----------|------|-----------|-----------|-----------|
| C    | -1.162369 | 0.731064  | 5.785446  | C    | 0.048004  | -2.811951 | 1.609375  |
| C    | -0.450714 | 0.561050  | 4.482178  | N    | 0.547073  | -4.163467 | -0.039612 |
| C    | -0.915985 | 0.403427  | 3.196289  | C    | 0.468903  | -2.902023 | -0.534027 |
| N    | 0.936066  | 0.514252  | 4.356064  | N    | 0.183121  | -2.059830 | 0.449890  |
| C    | 1.250076  | 0.345000  | 3.035126  | H    | 0.091278  | -5.258362 | 3.213623  |
| N    | 0.142517  | 0.287720  | 2.305832  | H    | 1.184235  | -5.933670 | 1.994110  |
| H    | -1.576981 | -0.197281 | 6.205383  | H    | -0.545563 | -6.053436 | 1.764236  |
| H    | -1.990479 | 1.438461  | 5.664597  | H    | -0.204086 | -2.344604 | 2.545517  |
| H    | -0.496460 | 1.173462  | 6.534332  | H    | 0.711151  | -4.984300 | -0.622070 |
| H    | -1.928665 | 0.327621  | 2.847443  | H    | 0.597946  | -2.627228 | -1.565842 |
| H    | 1.597397  | 0.485565  | 5.122269  | O    | -0.221207 | -0.451736 | -1.803070 |
| H    | 2.251205  | 0.279175  | 2.642532  | H    | 0.352249  | -0.027451 | -2.449829 |
| C    | -5.953659 | 0.684433  | 0.095688  | Fe   | 0.000000  | 0.000000  | 0.000000  |
| C    | -4.547043 | 0.155487  | 0.023972  | N    | 0.000000  | 2.236511  | -0.000031 |
| C    | -3.324707 | 0.761047  | -0.227051 | C    | 1.356888  | 2.819992  | 0.235977  |
| N    | -4.216690 | -1.097519 | 0.517410  | C    | 1.466476  | 4.326492  | -0.057388 |
| C    | -2.864120 | -1.194778 | 0.587173  | O    | 0.822037  | 4.783844  | -1.099121 |
| N    | -2.280594 | -0.081726 | 0.153214  | C    | 2.364212  | 2.046677  | -0.633728 |
| H    | -6.152023 | 1.165802  | 1.064682  | S    | 2.409012  | 0.273331  | -0.134979 |
| H    | -6.682846 | -0.121200 | -0.045029 | O    | 2.219284  | 5.044006  | 0.674942  |
| H    | -6.137131 | 1.419861  | -0.692505 | H    | -0.668488 | 2.610947  | 0.679657  |
| H    | -3.130630 | 1.683746  | -0.750137 | H    | -0.325882 | 2.482086  | -0.941376 |
| H    | -4.825226 | -1.890793 | 0.759018  | H    | 1.592850  | 2.664825  | 1.289612  |
| H    | -2.368378 | -2.077988 | 0.948471  | H    | 3.361374  | 2.473724  | -0.522385 |
| C    | 0.243652  | -5.387192 | 2.131882  | H    | 2.069870  | 2.121841  | -1.686295 |
| C    | 0.272690  | -4.138031 | 1.327759  |      |           |           |           |

**Table S9:** Cartesian coordinates (in Å) for the QM/MM-optimized active site of WT (NO/Cys)-Fe(II)CDO (SCF Energy = -4742.70683861 Eh)

| Atom | x         | y         | z         | Atom | x         | y         | z         |
|------|-----------|-----------|-----------|------|-----------|-----------|-----------|
| C    | -1.326538 | 0.508896  | -5.540115 | C    | -0.388947 | 2.987747  | -0.654358 |
| C    | -0.565170 | 0.462311  | -4.258728 | N    | 0.422546  | 3.976288  | 1.117371  |
| C    | -0.891129 | -0.059341 | -3.027863 | C    | 0.533936  | 2.633606  | 1.289063  |
| N    | 0.658325  | 1.101181  | -4.054596 | N    | 0.056213  | 1.999786  | 0.225784  |
| C    | 1.011108  | 0.956924  | -2.742783 | N    | 0.197021  | -0.294128 | 1.732925  |
| N    | 0.094803  | 0.247025  | -2.096573 | O    | 0.536331  | 0.146698  | 2.762512  |
| H    | -1.920715 | 1.488678  | -5.698685 | Fe   | 0.000000  | 0.000000  | 0.000000  |
| H    | -2.046707 | -0.315079 | -5.559464 | N    | 0.164352  | -2.073578 | -0.384247 |
| H    | -0.669037 | 0.359589  | -6.402344 | C    | 1.535553  | -2.504578 | -0.824707 |
| H    | -1.732758 | -0.670303 | -2.760193 | C    | 1.739563  | -4.027649 | -0.796326 |
| H    | 1.137955  | 1.700363  | -4.713196 | O    | 1.184341  | -4.694946 | 0.183762  |
| H    | 1.914490  | 1.346191  | -2.309052 | C    | 2.571457  | -1.825836 | 0.083496  |
| C    | -5.654907 | -1.302795 | 0.213181  | S    | 2.369034  | 0.000046  | -0.000015 |
| C    | -4.309600 | -0.633560 | 0.280289  | O    | 2.502213  | -4.563187 | -1.663513 |
| C    | -3.001938 | -1.081955 | 0.340286  | H    | -0.531967 | 5.789139  | -1.703323 |
| N    | -4.182312 | 0.732727  | 0.048386  | H    | 0.357100  | 6.280090  | -0.205490 |
| C    | -2.861053 | 1.052567  | -0.068649 | H    | -1.374985 | 6.011490  | -0.107437 |
| N    | -2.107544 | -0.029602 | 0.098526  | H    | -0.847977 | 2.742874  | -1.596619 |
| H    | -5.986557 | -1.544510 | -0.875381 | H    | 0.662262  | 4.628403  | 1.861115  |
| H    | -6.419891 | -0.659302 | 0.662094  | H    | 0.970642  | 2.188858  | 2.163803  |
| H    | -5.655396 | -2.232056 | 0.786850  | H    | -0.517593 | -2.403534 | -1.071457 |
| H    | -2.648895 | -2.055984 | 0.636398  | H    | -0.055618 | -2.537796 | 0.500305  |
| H    | -4.951172 | 1.381149  | -0.135193 | H    | 1.667328  | -2.155000 | -1.849472 |
| H    | -2.545807 | 2.062531  | -0.261780 | H    | 3.580048  | -2.093018 | -0.236800 |
| C    | -0.450729 | 5.629776  | -0.563568 | H    | 2.436661  | -2.161713 | 1.116837  |
| C    | -0.172440 | 4.234619  | -0.112991 |      |           |           |           |

**Table S10:** Cartesian coordinates (in Å) for the QM/MM-optimized active site of H155A (NO/Cys)-Fe(II)CDO (SCF Energy = -4517.79844890 Eh)

| Atom | x         | y         | z         | Atom | x         | y         | z         |
|------|-----------|-----------|-----------|------|-----------|-----------|-----------|
| C    | -1.175125 | -0.149490 | -5.631866 | C    | -0.093338 | 2.900482  | -1.097031 |
| C    | -0.455490 | -0.097534 | -4.325897 | N    | 0.434189  | 4.084122  | 0.665649  |
| C    | -0.910233 | -0.117737 | -3.027740 | C    | 0.410950  | 2.771362  | 1.020416  |
| N    | 0.922852  | 0.056534  | -4.208100 | N    | 0.103363  | 2.023468  | -0.029816 |
| C    | 1.246231  | 0.115448  | -2.881714 | H    | -0.121735 | 5.569275  | -2.472183 |
| N    | 0.150726  | -0.002563 | -2.139877 | H    | 0.948456  | 6.100021  | -1.110809 |
| H    | -1.642960 | 0.857346  | -5.947037 | H    | -0.784088 | 6.122772  | -0.877000 |
| H    | -1.980469 | -0.890778 | -5.585556 | H    | -0.362381 | 2.534607  | -2.072479 |
| H    | -0.505630 | -0.480164 | -6.433273 | H    | 0.594864  | 4.842163  | 1.328690  |
| H    | -1.917389 | -0.166489 | -2.662476 | H    | 0.635178  | 2.428558  | 2.013916  |
| H    | 1.569200  | 0.220840  | -4.969849 | N    | 0.000000  | -0.000015 | 1.775909  |
| H    | 2.242065  | 0.225174  | -2.486282 | O    | 0.676666  | -0.205475 | 2.701416  |
| C    | -5.810608 | -0.890182 | 0.070526  | Fe   | 0.000000  | 0.000000  | 0.000000  |
| C    | -4.414032 | -0.320923 | 0.137421  | N    | 0.098938  | -2.075043 | -0.158173 |
| C    | -3.153458 | -0.884842 | 0.288483  | C    | 1.481232  | -2.588562 | -0.452408 |
| N    | -4.158905 | 0.994949  | -0.216583 | C    | 1.650558  | -4.109543 | -0.284531 |
| C    | -2.815613 | 1.172928  | -0.303513 | O    | 1.005768  | -4.688522 | 0.696106  |
| N    | -2.159027 | 0.052368  | -0.013367 | C    | 2.455307  | -1.835007 | 0.465225  |
| H    | -6.072357 | -1.289291 | -0.989578 | S    | 2.336258  | -0.032761 | 0.107956  |
| H    | -6.548645 | -0.125427 | 0.338165  | O    | 2.452164  | -4.725342 | -1.055725 |
| H    | -5.935500 | -1.710663 | 0.782700  | H    | -0.546249 | -2.406815 | -0.881714 |
| H    | -2.900833 | -1.848312 | 0.701035  | H    | -0.217102 | -2.464996 | 0.734436  |
| H    | -4.815613 | 1.777557  | -0.342697 | H    | 1.697250  | -2.342438 | -1.492615 |
| H    | -2.379776 | 2.116638  | -0.575790 | H    | 3.475281  | -2.180786 | 0.295395  |
| C    | 0.029434  | 5.541962  | -1.327988 | H    | 2.193176  | -2.018936 | 1.513107  |
| C    | 0.110703  | 4.198364  | -0.683350 |      |           |           |           |

**Table S11:** Cartesian coordinates (in Å) for the QM/MM-optimized active site of H155A (O<sub>2</sub>/Cys)-Fe(II) CDO, singlet ground state (SCF Energy = -4538.20273185 Eh)

| Atom | x         | y         | z         | Atom | x         | y         | z         |
|------|-----------|-----------|-----------|------|-----------|-----------|-----------|
| C    | -1.480225 | 0.075302  | 5.503098  | C    | -0.027588 | -2.914597 | 1.070969  |
| C    | -0.688995 | 0.073853  | 4.236969  | N    | 0.631302  | -4.036255 | -0.688766 |
| C    | -1.072144 | 0.119110  | 2.916641  | C    | 0.560440  | -2.719589 | -1.022247 |
| N    | 0.696625  | -0.054794 | 4.191406  | N    | 0.172714  | -2.010864 | 0.029541  |
| C    | 1.093521  | -0.080307 | 2.885193  | O    | 0.016327  | -0.160110 | -1.783890 |
| N    | 0.038177  | 0.041916  | 2.085678  | O    | 0.918503  | 0.437958  | -2.461044 |
| H    | -1.887527 | -0.908463 | 5.779343  | Fe   | 0.000000  | 0.000000  | 0.000000  |
| H    | -2.322296 | 0.770157  | 5.413498  | N    | 0.000000  | 2.060287  | 0.000015  |
| H    | -0.875427 | 0.440704  | 6.340179  | C    | 1.294891  | 2.651474  | 0.466629  |
| H    | -2.055374 | 0.178314  | 2.495728  | C    | 1.460953  | 4.182083  | 0.325668  |
| H    | 1.306931  | -0.224976 | 4.981430  | O    | 0.812759  | 4.822922  | -0.614929 |
| H    | 2.111389  | -0.184784 | 2.551392  | C    | 2.424637  | 1.946411  | -0.294815 |
| C    | -5.765015 | 0.681534  | -0.447937 | S    | 2.291336  | 0.130768  | -0.050278 |
| C    | -4.351791 | 0.157166  | -0.423523 | O    | 2.308487  | 4.719467  | 1.104400  |
| C    | -3.105881 | 0.767914  | -0.447510 | H    | 0.021149  | -5.585907 | 2.350327  |
| N    | -4.076996 | -1.167969 | -0.120041 | H    | 1.177979  | -6.049622 | 1.096329  |
| C    | -2.739212 | -1.309296 | 0.058472  | H    | -0.535629 | -6.167618 | 0.772156  |
| N    | -2.105042 | -0.153137 | -0.120972 | H    | -0.363098 | -2.580643 | 2.037613  |
| H    | -6.115097 | 1.001816  | 0.544464  | H    | 0.860855  | -4.773132 | -1.355637 |
| H    | -6.453796 | -0.085846 | -0.819885 | H    | 0.793442  | -2.334824 | -1.998444 |
| H    | -5.849350 | 1.538620  | -1.122894 | H    | -0.756454 | 2.436172  | 0.576874  |
| H    | -2.858612 | 1.755295  | -0.800247 | H    | -0.175385 | 2.344147  | -0.973022 |
| H    | -4.703705 | -1.981522 | -0.107407 | H    | 1.376617  | 2.429153  | 1.532516  |
| H    | -2.291534 | -2.252548 | 0.310364  | H    | 3.389420  | 2.307938  | 0.058029  |
| C    | 0.218964  | -5.546005 | 1.268997  | H    | 2.320145  | 2.138763  | -1.367661 |
| C    | 0.256165  | -4.192520 | 0.643250  |      |           |           |           |

**Table S12:** Cartesian coordinates (in Å) for the QM/MM-optimized active site of H155A (O<sub>2</sub>/Cys)-Fe(II) CDO, triplet ground state (SCF Energy = -4538.22156598 Eh)

| Atom | x         | y         | z         | Atom | x         | y         | z         |
|------|-----------|-----------|-----------|------|-----------|-----------|-----------|
| C    | -1.626221 | 0.072342  | 5.430954  | C    | -0.123123 | -2.910583 | 1.008270  |
| C    | -0.782028 | 0.064285  | 4.200821  | N    | 0.550079  | -4.030090 | -0.746338 |
| C    | -1.114975 | 0.146912  | 2.869629  | C    | 0.543594  | -2.707214 | -1.062073 |
| N    | 0.597610  | -0.121628 | 4.203644  | N    | 0.149323  | -1.999252 | -0.011475 |
| C    | 1.041794  | -0.140594 | 2.912048  | O    | -0.020798 | -0.021530 | -1.893539 |
| N    | 0.021057  | 0.033737  | 2.079437  | O    | 0.956619  | -0.175018 | -2.705261 |
| H    | -2.073593 | -0.903656 | 5.670181  | Fe   | 0.000000  | 0.000000  | 0.000000  |
| H    | -2.442841 | 0.793152  | 5.315308  | N    | 0.000000  | 2.080475  | -0.000015 |
| H    | -1.049103 | 0.405640  | 6.300293  | C    | 1.326126  | 2.637604  | 0.417145  |
| H    | -2.078735 | 0.262924  | 2.416931  | C    | 1.520508  | 4.164841  | 0.297256  |
| H    | 1.171783  | -0.323532 | 5.012939  | O    | 0.915527  | 4.816681  | -0.662781 |
| H    | 2.067886  | -0.266403 | 2.613907  | C    | 2.392044  | 1.897552  | -0.402969 |
| C    | -5.740875 | 0.819519  | -0.647202 | S    | 2.248306  | 0.099792  | -0.038116 |
| C    | -4.342300 | 0.258774  | -0.578979 | O    | 2.344055  | 4.689606  | 1.109985  |
| C    | -3.082977 | 0.839874  | -0.560318 | H    | -0.200043 | -5.602448 | 2.249527  |
| N    | -4.109253 | -1.072510 | -0.261078 | H    | 0.975128  | -6.083710 | 1.020340  |
| C    | -2.783829 | -1.243759 | -0.031281 | H    | -0.731659 | -6.143021 | 0.648529  |
| N    | -2.117645 | -0.102188 | -0.190369 | H    | -0.477325 | -2.578200 | 1.968872  |
| H    | -6.112274 | 1.149231  | 0.334305  | H    | 0.772461  | -4.765564 | -1.417267 |
| H    | -6.437851 | 0.070313  | -1.040329 | H    | 0.843781  | -2.318237 | -2.018585 |
| H    | -5.781647 | 1.678100  | -1.324265 | H    | -0.729965 | 2.460129  | 0.608246  |
| H    | -2.799042 | 1.818481  | -0.909485 | H    | -0.203110 | 2.371292  | -0.964203 |
| H    | -4.755341 | -1.871872 | -0.273376 | H    | 1.450700  | 2.394684  | 1.473846  |
| H    | -2.365433 | -2.195267 | 0.241226  | H    | 3.387390  | 2.255951  | -0.141876 |
| C    | 0.027924  | -5.552353 | 1.174576  | H    | 2.217651  | 2.050079  | -1.473312 |
| C    | 0.126343  | -4.191971 | 0.570114  |      |           |           |           |

**Table S13:** Cartesian coordinates (in Å) for the QM/MM-optimized active site of H155A (O<sub>2</sub>/Cys)-Fe(II) CDO, quintet ground state (SCF Energy = -4538.19460937 Eh)

| Atom | x         | y         | z         | Atom | x         | y         | z         |
|------|-----------|-----------|-----------|------|-----------|-----------|-----------|
| C    | -1.734253 | 0.343400  | 5.661728  | C    | -0.121674 | -2.852493 | 1.272980  |
| C    | -0.867371 | 0.235168  | 4.454437  | N    | 1.023056  | -4.032500 | -0.173080 |
| C    | -1.181686 | 0.256516  | 3.114304  | C    | 0.998367  | -2.741577 | -0.598358 |
| N    | 0.510132  | 0.032074  | 4.486404  | N    | 0.304855  | -2.003937 | 0.258423  |
| C    | 0.962662  | -0.049164 | 3.192856  | H    | 0.150009  | -5.280716 | 2.878021  |
| N    | -0.041245 | 0.101181  | 2.344757  | H    | 1.231308  | -5.930008 | 1.641922  |
| H    | -2.208694 | -0.600830 | 5.967285  | H    | -0.504913 | -6.072845 | 1.427139  |
| H    | -2.540649 | 1.057022  | 5.469391  | H    | -0.698090 | -2.483963 | 2.104340  |
| H    | -1.175507 | 0.740997  | 6.514618  | H    | 1.498016  | -4.766861 | -0.691116 |
| H    | -2.146164 | 0.310852  | 2.645828  | H    | 1.477676  | -2.395554 | -1.496902 |
| H    | 1.057281  | -0.161163 | 5.312714  | O    | -0.137848 | -0.652740 | -2.133011 |
| H    | 1.990356  | -0.207886 | 2.913559  | O    | -0.900116 | -1.594574 | -2.543640 |
| C    | -5.727295 | 0.555298  | -0.618378 | Fe   | 0.000000  | 0.000000  | 0.000000  |
| C    | -4.296570 | 0.105453  | -0.522324 | N    | 0.000000  | 2.089844  | 0.000000  |
| C    | -3.101669 | 0.755844  | -0.287857 | C    | 1.279739  | 2.672485  | 0.550888  |
| N    | -3.968475 | -1.243300 | -0.482666 | C    | 1.353317  | 4.215363  | 0.533813  |
| C    | -2.642380 | -1.375061 | -0.236435 | O    | 1.014984  | 4.812271  | -0.585220 |
| N    | -2.072418 | -0.177582 | -0.110275 | C    | 2.411545  | 2.023895  | -0.250259 |
| H    | -6.106949 | 0.943375  | 0.338333  | S    | 2.242798  | 0.195053  | -0.066818 |
| H    | -6.364624 | -0.281067 | -0.926010 | O    | 1.766876  | 4.830032  | 1.562485  |
| H    | -5.853241 | 1.334595  | -1.373032 | H    | -0.803391 | 2.463791  | 0.517883  |
| H    | -2.911850 | 1.811707  | -0.239120 | H    | -0.106979 | 2.375000  | -0.984558 |
| H    | -4.585236 | -2.039307 | -0.573578 | H    | 1.344284  | 2.362061  | 1.594849  |
| H    | -2.172806 | -2.332962 | -0.161041 | H    | 3.391434  | 2.325821  | 0.123383  |
| C    | 0.284637  | -5.401123 | 1.792984  | H    | 2.334473  | 2.284302  | -1.309906 |
| C    | 0.330994  | -4.128235 | 1.028549  |      |           |           |           |
